# Supplementary material for: Improved CRISPR/Cas9 Tools for the Rapid Metabolic Engineering of Clostridium acetobutylicum
Source: PubMed Central journal article supplement (PMC8037352; doi:10.3390/ijms22073704), 2021-04-02
Supplement: ijms-22-03704-s001.pdf [file ijms-22-03704-s001.pdf]

## Supplementary materials

# Improved CRISPR/Cas9 Tools for the Rapid Metabolic Engineering of *Clostridium acetobutylicum*

Tom Wilding-Steele<sup>1,2,3</sup>, Quentin Ramette<sup>1,2,3</sup>, Paul Jacottin<sup>1,2,3</sup> and Philippe Soucaille<sup>1,2,3,4,\*</sup>

<sup>1</sup> INP, LISBP, INSA, UPS, Université de Toulouse, 31400 Toulouse, France; wilding-@insa-toulouse.fr (T.W.-S.); ramette@insa-toulouse.fr (Q.R.); jacottin@insa-toulouse.fr (P.J.)

<sup>2</sup> Institut National de la Recherche Agronomique (INRA), UMR 792, 31077 Toulouse, France

<sup>3</sup> Centre National de la Recherche Scientifique (CNRS), UMR 5504, 31400 Toulouse, France

<sup>4</sup> BBSRC/EPSRC Synthetic Biology Research Centre (SBRC), School of Life Sciences, The University of Nottingham, University Park, Nottingham NG7 2RD, UK

\* Correspondence: soucaille@insa-toulouse.fr

### Cloning of constructs

A cassette consisting of a xylose inducible promoter and repressor from *C. difficile*, the wild-type *cas9* gene from *S. pyrogenes*, flanked by terminators along with homology arms, and a gRNA targeting the intergenic region under control of the j23119 promoter along with flanking SapI sites was synthesized (see sequence *cas9* cassette). pCons2-1 was digested with SapI along with the *cas9* cassette, followed by ligation creating pINT\_Cas9. To construct pConsΔupp\_HA1000, pCons2-1 [5] was digested with BamHI/EcoRI, the homology arms for *upp* were PCR amplified from strain MGC\_del1502 [5] using primers PC1 and PC2. The PCR product was digested with BamHI/EcoRI followed by ligation. The gRNA sequence consisting of the promoter (either j23119 or miniPthI), 20 bp gRNA sequence and scaffold were synthesized along with relevant cloning sites. This was then cloned into pConsΔupp\_HA1000 by digesting the synthesized gRNA and pConsΔupp\_HA1000 with ApaI and BamHI followed by ligation, creating pGRNAminiPthIΔupp\_HA1000 and pGRNAJ23119Δupp\_HA1000.

pGRNAminiPthIΔupp\_HA500, pGRNAminiPthIΔupp\_HA250 and pGRNAminiPthIΔupp\_HA100 were cloned by amplifying the relevant homology arms using primer pairs PC3 and PC4 for 100 bp, PC5 and PC6 for 250bp and PC7 and PC8 for 500 bp. pGRNAminiPthIΔupp\_HA1000 and the PCR products were digested with BamHI/EcoRI followed by ligation.

pGRNAΔ*ldhA*, pGRNAΔ*ptb-buk* and pGRNAΔ*cas9* were cloned using pCons::upp [5] as a template, the gRNA was synthesized and added as described for *upp*. For pGRNAΔ*ldhA* the homology arms were amplified using primers PC13 and PC14 using strain ΔCA\_C 1502ΔCA\_C 2879ΔCA\_C 3535ΔCA\_C 0267 [5] as a template, the PCR product and backbone were then digested with BamHI/EcoRI followed by ligation. For pGRNAΔ*cas9* the relevant homology arms were amplified by PCR using wild-type *C. acetobutylicum* gDNA for a template using primers PC15 and PC16, the PCR product and backbone were then digested with BamHI/EcoRI followed by ligation. For pGRNAΔ*ptb-buk* the backbone was digested with BamHI/EcoRI and the relevant homology arms were then cloned using GeneArt™ Seamless Cloning and Assembly kit, using primers PC9 to PC12.

Table S1. A list of gRNA sequence used to target each gene.

| Target         | gRNA sequence        |
|----------------|----------------------|
| <i>upp</i>     | ACTAAATGTAAAATGTTAGC |
| <i>ldhA</i>    | AGTTGGAATTAACGGAGTGA |
| <i>buk-ptb</i> | TTAATCGTAGTCCACATGGG |
| <i>cas9</i>    | CTCGTAGAAGGTATACACGT |

**Table S2.** List of PCR primers used.

| Screening primers |                  |                                               |
|-------------------|------------------|-----------------------------------------------|
| PS1               | pyrEscreen_Fw    | TGTTGGAACAGAAATAGCTGGATGT                     |
| PS2               | pyrEscreen_Rev   | ACCAGAAGATAAGGATGCTCTAGTTGA                   |
| PS3               | UPPscreen_Fw     | CTCTATCAGGCGGACAAAAGCAAAA                     |
| PS4               | UPPscreen_Rev    | CTTTTGACGAAGAAGGCTTTGGAGT                     |
| PS5               | ldhAscreen_fw    | GGGAAAGGTTTTAAGAGCGGCG                        |
| PS6               | ldhAscreen_rev   | CAACAATTGTCTCCGGTTTCAAGGG                     |
| PS7               | bukptbscreen_Fw  | ACATGGGGCCTGACATTTTCATTTTT                    |
| PS8               | bukptbscreen_Rev | GGATCCTAGATGCACGTATGTTTTAGAAG                 |
| Cloning primers   |                  |                                               |
| PC1               | UPP_BAMHI_Fw     | ACTAGTGGATCCATAATATGTGTAGAACATAATTTAAAGGC     |
| PC2               | UPP_EcoR1_Rev    | GTAATGGAATTCCTACTTGGTTTTATAGAGATTTTAAAGG      |
| PC3               | UPP_100_FW       | CTATATGGATCCTAATTTCTATTATTATCAGAAGAGGCA       |
| PC4               | UPP_100_REV      | ATGCATGAATTCGTAGATACATTTTTAAATTCAAAATTTCAAGGG |
| PC5               | UPP_250_FW       | CTCCAGGATCCATGCAGTTTAAAAAGGGATTTAAGT          |
| PC6               | UPP_250_REV      | CATCTGAATTCGAATACTCATTGTGGAACAGGTATAGG        |
| PC7               | UPP_500_FW       | TGTGCTGGATCCACTGTTGGTAAAAGTGATCTCG            |
| PC8               | UPP_500_REV      | TCTGCTGAATTCATCTTCTTTTTTTGCGATTATGTAT         |
| PC9               | LH-delbukptb_fwd | CGGCCGCTCTAGAAGTAGTG AACAGGACTTAAGAATATTATCC  |
| PC10              | LH-delbukptb_rev | TGTACGACCATAAAGTCATAAATAATATAATATAACCAGTAC    |
| PC11              | RH-delbukptb_fwd | TATGACTTTATGGTCGTACACTCCCTTTTAC               |
| PC12              | RH-delbukptb_rev | CACGGATCTGGATCATTACGAAATGGAGCTGAGATTCCATG     |
| PC13              | ldh_ecor1        | GTAATGGAATTCGTCGACAAAAAAGCACCGACTCG           |
| PC14              | ldh_bamh1        | CTCTTTCCAAATTTTAAAGCGGATCCAGATCC              |
| PC15              | PyrE_BAMH1_Fw    | GCATGGGATCCGGTGGAGAGTAATGTACTIONTACCTTTGGG    |
| PC16              | PyrE_Ecor1_rev   | GCTGCTTTAAAAGAAAAATCCC                        |

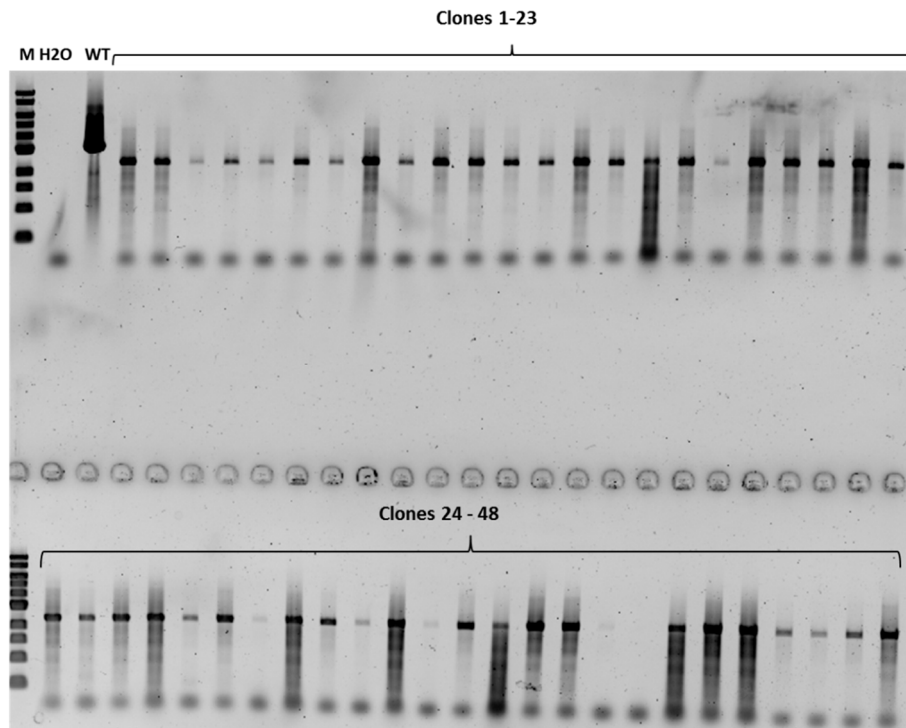

**Figure S1.** - Deletion of *upp* in strain *CAS1* using pGRNAminiPthl $\Delta$ *upp*\_HA1000. PCR amplification using primers PS3 and PS4 showing the correct deletion of the *upp* gene. Amplification results in a 3200 bp band for the wild-type and a 2500 bp band when the *upp* gene is deleted. Lane M; 2-log DNA ladder (NEB), H2O; water control, WT; MGC $\Delta$ *cac1502* gDNA, 1-48 – Clones 1 -48 showing correct deletion of *upp*.

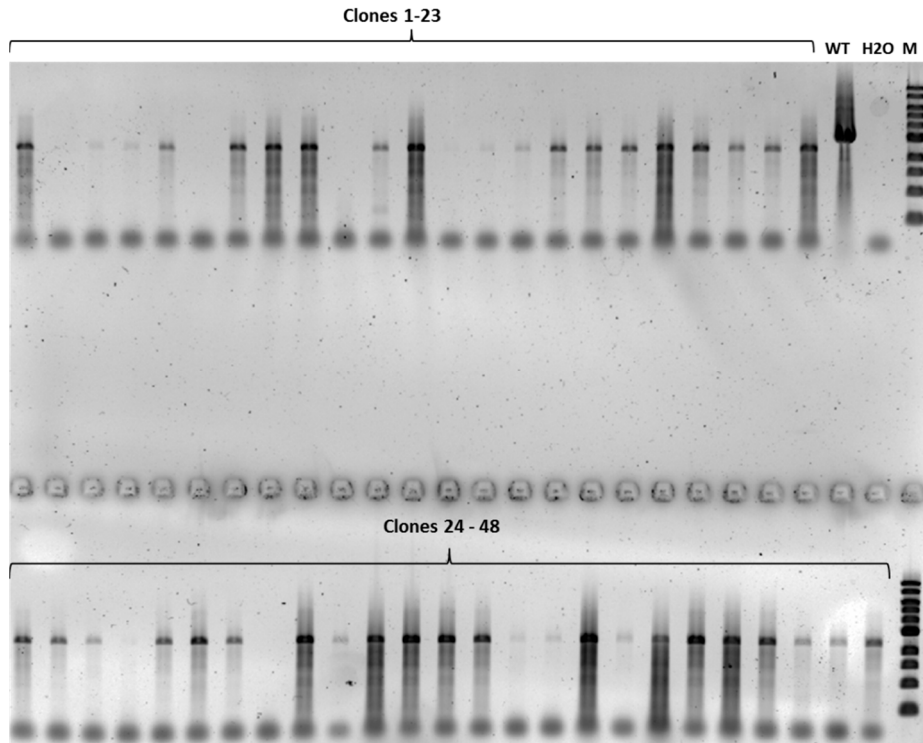

**Figure S2.** - Deletion of *upp* in strain *CAS1* using pGRNAJ23119 $\Delta$ upp\_HA1000. PCR amplification using primers PS3 and PS4 showing the correct deletion of the *upp* gene. Amplification results in a 3200 bp band for the wild-type and a 2500 bp band when the *upp* gene is deleted. Lane M; 2-log DNA ladder (NEB), H2O; water control, WT; MGC $\Delta$ cac1502 gDNA, 1-48 – Clones 1 -48 showing deletion of *upp*.

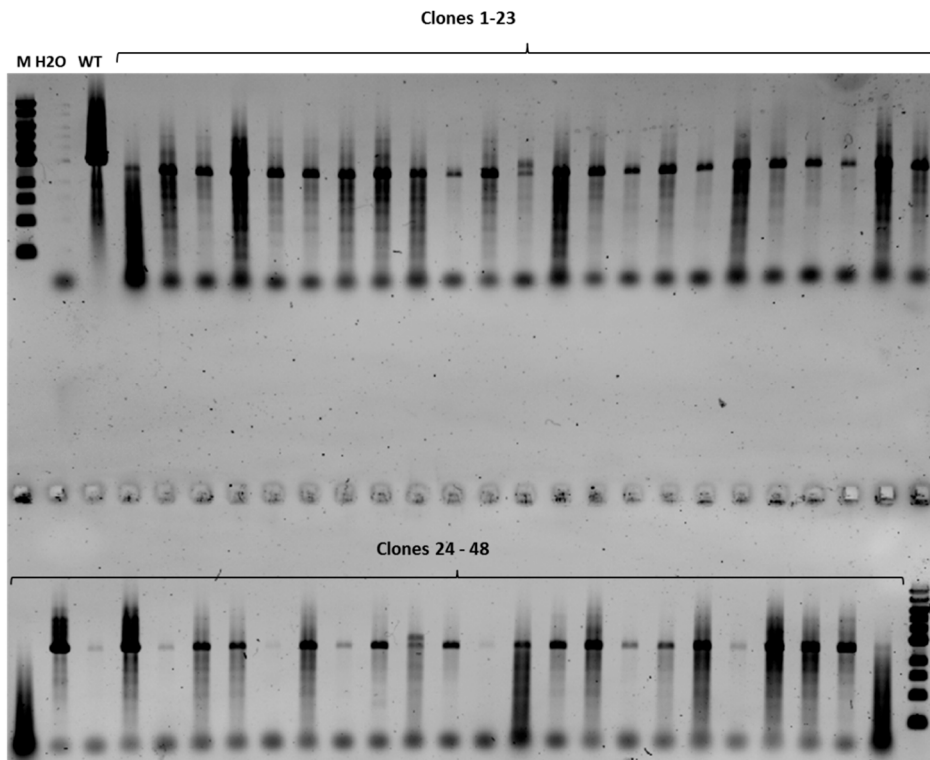

**Figure S3.** - Deletion of *upp* in strain *CAS1* using pGRNAminiPthl $\Delta$ upp\_HA500. PCR amplification using primers PS3 and PS4 showing the correct deletion of the *upp* gene. Amplification results in a 3200 bp band for the wild-type and a 2500 bp band when the *upp* gene is deleted. Lane M; 2-log DNA ladder (NEB), H2O; water control, WT; MGC $\Delta$ cac1502 gDNA, 1-48 – Clones 11 and 36 show a mixed genotype of wild-type/ $\Delta$ upp, clone 24 was excluded as no amplification can be seen, all other clones show a  $\Delta$ upp genotype.

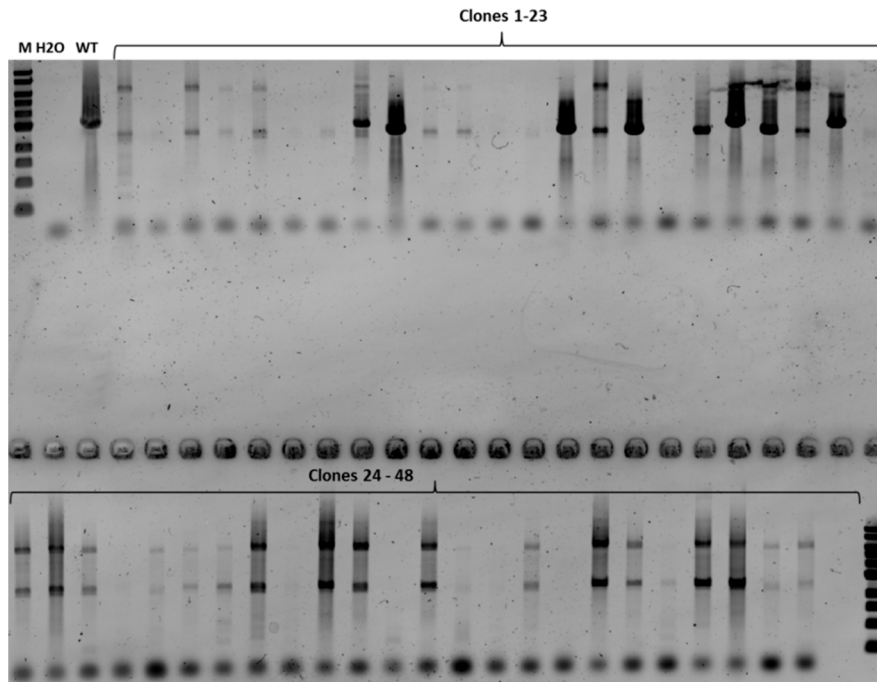

**Figure S4.** - Deletion of *upp* in strain *CAS1* using pGRNAminiPthl $\Delta$ *upp*\_HA250. PCR amplification using primers PS3 and PS4 showing the correct deletion of the *upp* gene. Amplification results in a 3200 bp band for the wild-type and a 2500 bp band when the *upp* gene is deleted. Lane M; 2-log DNA ladder (NEB), H2O; water control, WT; MGC $\Delta$ *cac1502* gDNA, 1-48 – clone 8 showed a mixed genotype, clones 19 and 22 were wild-type, while clones 2, 6, 12, 17, 32, 35, 40 and 48 were excluded as no amplification could be seen.

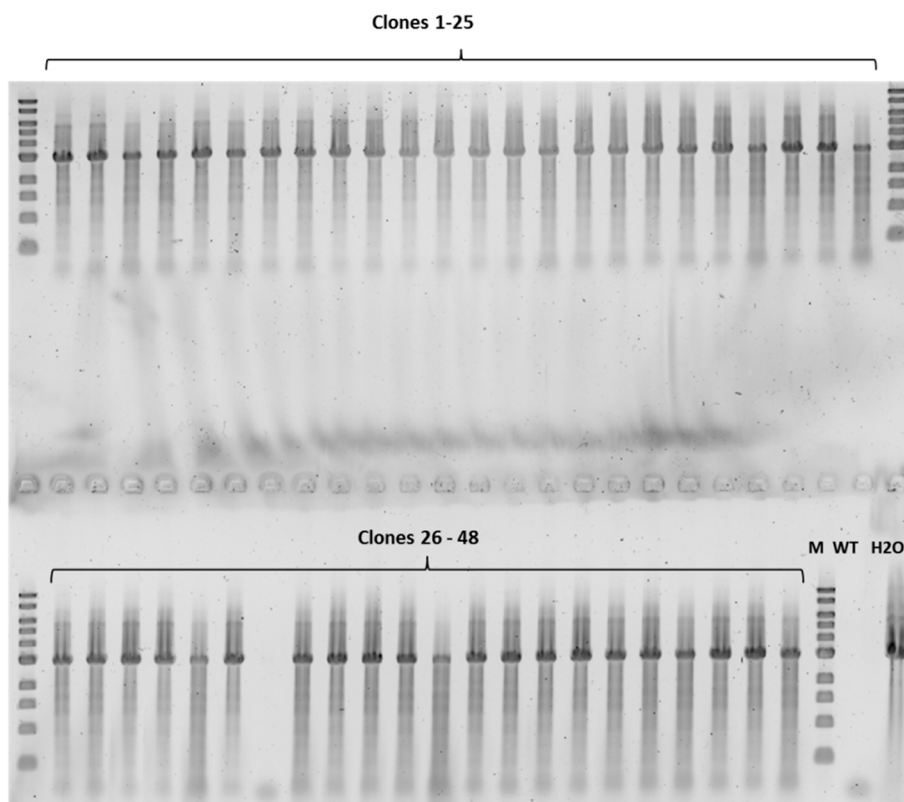

**Figure S5.** - Deletion of *upp* in strain *CAS1* using pGRNAminiPthl $\Delta$ *upp*\_HA100. PCR amplification using primers PS3 and PS4 showing the correct deletion of the *upp* gene. Amplification results in a 3200 bp band for the wild-type and a 2500 bp band when the *upp* gene is deleted. Lane M; 2-log DNA ladder (NEB), H2O; water control, WT; MGC $\Delta$ *cac1502* gDNA, 1-48 – Clone 33 was excluded as no amplification was observed. All other clones were wild-type.

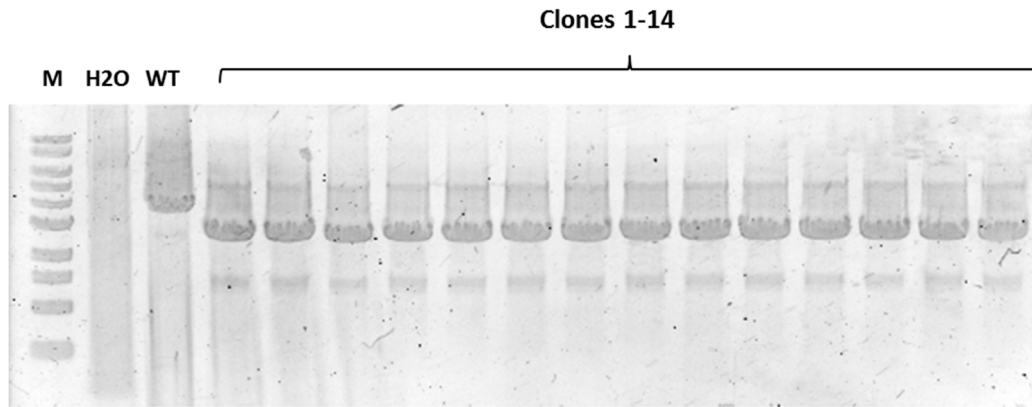

**Figure S6.** – Deletion of *ldhA* in strain CAS2 using pGRNA $\Delta$ *ldhA*. PCR amplification using primers PS5 and PS6 showing the correct deletion of the *ldhA* gene. Amplification results in a 4000 bp band for the wild-type and a 3000 bp band when the *ldhA* gene is deleted. Lane M; 2-log DNA ladder (NEB), H2O; water control, WT; MGC $\Delta$ *cac1502* gDNA, 1-14 = correct deletion of *ldhA*.

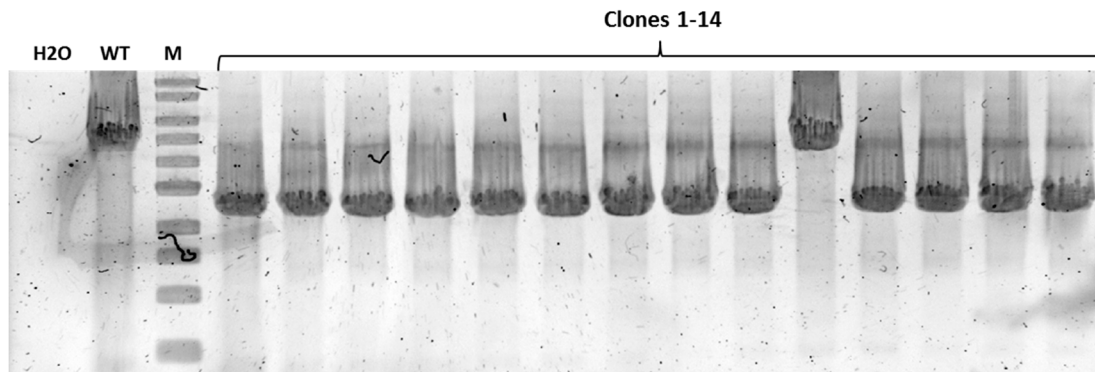

**Figure S7.** – Deletion of the *ptb-buk* operon in strain CAS2 using pGRNA $\Delta$ *ptb-buk*. PCR amplification using primers PS7 and PS8 showing the correct deletion of the *ptb-buk operon*. Amplification results in a 4800 bp band for the wild-type and a 2800 bp band when the *ptb-buk operon* is deleted. Lane M; 2-log DNA ladder (NEB), H2O; water control, WT; MGC $\Delta$ *cac1502* gDNA, 1-14 = Clone 10 showed a wild-type genotype, while all other clones showed deletion of the *ptb-buk* operon.

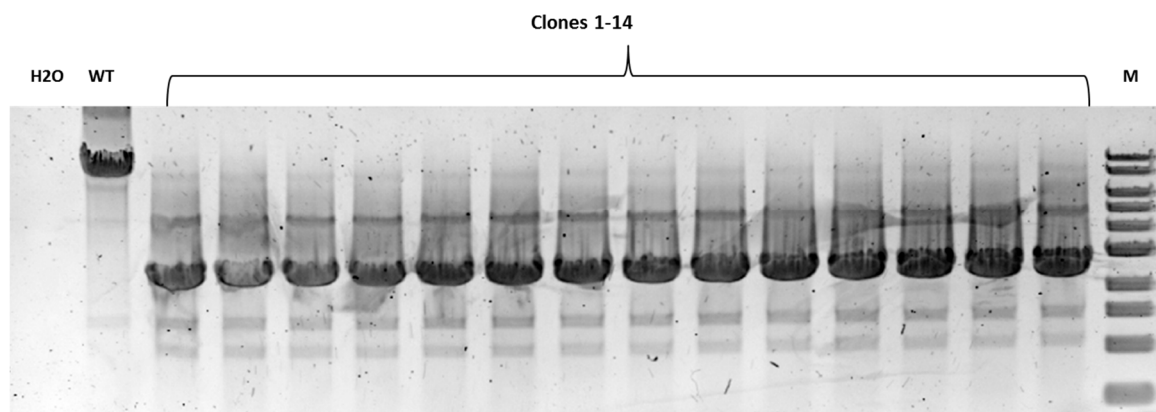

**Figure S8.** – Removal of *cas9* using pGRNA $\Delta$ *cas*. PCR amplification using primers PS1 and PS2 showing the correct removal of the Cas9 cassette at the *pyrE* locus, amplification results in a 8250 bp band for strain CAS1 and an 2425bp band when the Cas9 cassette has been removed. Lane M; 2-log DNA ladder (NEB), H2O; water control, WT; CAS1, 1-14; Clones 1-14 where PCR amplification indicates correct removal of the Cas9 cassette. .

## Sequence of Cas9 cassette

GAAGAGCGGGCCCTTGACAGCTAGCTCAGTCCTAGGTATAATACTAGTGTGCCTTAACATCTAAGTTG  
GTTTTAGAGCTAGAAATAGCAAGTTAAAATAAGGCTAGTCCGTTATCAACTGAAAAAGTGGCACCG  
AGTCGGTGCTTTTTTTCCCTGCAGGAGAGTAATGTACTTACCTTTGGGGATTTTCATAACTAAAAGCGG  
CAGAAGAACACCATTTTTTATAAATACAGGTA ACTACAAGACAGGTAATCAATTAATAAGTTGGCT  
AAGTTTTATGCTAAAGCAATATATGATAATTTTGGAGATGATTTTGATATTTTATTTGGGCCTGCATAT  
AAAGGAATACCTTTAAGTGTTTCAGTAGCTATGGCACTTGATAATATTTATGGAATTAATGCAGCTTA  
TTGTTCAAATAGAAAAGAAGTTAAAGATCACGGTGATAAGGGAATACTTCTTGGAGCAAAGCTTGAA  
GAAGGAGACAGAGTTATAATTGTAGAAGATGTCACAACAGCTGGTACATCAGTATACGAAACAATG  
CCTATACTTAAATCACAGGCTGAGGTTGATGTAAAGGGAATCATAATATCAGTGGATAGAATGGAAA  
GAGGTAAGGGAGATAAGAGTGCCTTAACTGAACTTAAAGAAAAGTTTGGATTTAAAACATGTTCTAT  
TGTTACTATGGAAGAGGTAGTAGAATATTTGTATAAGAAAAATATCAATGGCAAAGTAATCATAGAT  
GATAAAATGAAAGATAGAATTAATGAGTACTATAAAGAGTATGGAGTAAAATAGTAAGCGGCCAGG  
GAATTCGGGGTCGACGTGTAAGCTCCTGCAGACTAGTTCACACTGGCTCACCTTCGGGTGGGCCTTT  
CTGCGTTTATATACTAGAGAGAGAATATAAAAAGCCATTAAGATTATATTTCAATTAATTAAGTTAAA  
TTTTGTATATTCAAAAAGCTCTTGATATTTACGGCAGAGCCACCATATAGAGATGCCTCAGACCCTAA  
TGATGAAATTTCTATATTTATTCCTTTGTTAAAAGAGCTAACTAACATATCTTTTGTAAATCTGTAATATC  
TCAGGGATATCACTAATTATTTGGCTATTTAAATATATTATTTTCAGGAGCATAAGTTGTAATAGCATT  
TTTATAGCTATTGTTAAGTAACTACAAAACATGAATAACTTTTTTGGCATTCTGGTTATCTTCATAAT  
ATAGTTGCTTTACTATATCAGAATCTATTTTAGGAATATTTTCTAAAGAAGAAAGCTGTTCAAATACCT  
TTTTTTCTGAACAATACTGTTCTAAACAGCCACGATTCCACAAGGACATAGTTTACCATTAGGCATG  
ATGATAGTGTGACCAATTTCTCCACTCATACCATTTCTGCCACTATATAATTTATTATTTATTATAATGC  
CTGAACCAAATCCACTGTGAATACTGAGACTAAGTAGTGAGTTATGTACAGTTGAAAAAGTATTCTC  
AGCTAAAGCTGTTAAGTTTGCTTCATTTTCTATATGAATAGGAAAGTCATACTTTTTGCTAAGGATGCT  
ATATAAGTCAATCTCATTAAAGATTGTAATATGGAGTAAACAATACTTTATTTTACAAGTAATCCCAT  
GTATAGCCAAAGTAAGACCAATTACCTTATAAGGAGTGTCTATTTTGGATATGTTATAACTATTTATA  
ATTCATCTATCAATTGTATAACATTGTCTTTACTTACTTGTATATCTGTTAATTTCTTAGAATTTATAAT  
AGTTCCATCTAAGTAAGATAGAGAAGAAAATATATAGTCGTATCCAACGTCCATACTTAAAGAAATC  
CCTGCACATTTATTAATACTAATAATATGGGTTTTCTCCGCCACTATGAGTACTATTTCCAATTCCT  
ATTCATGAACTAGAGATTCATCAATAAGTTTTTTGGTAATAGCGGATATAGTTGCTTTATTCAATCCT  
ATAGTAGAAGCTATACTTGCCTAGAAATAGGACCATTTTTTATAATTTGTTCAAGTACCAATCTTTCA  
TTCATTTCTCGAATAGTGTATTTATCAGTAACCAATTTGATATTCCTCCTTAAAATAATATTGTAATACT  
TTTTACACAAAAATAAAAAGTTATTTTGCATTGACAAAGATAATTAATATTTTATTATTAGTTCATAA  
GTTAGTTTAATACTAACA AAAATAAAGCAAGTAAAATATACCTAAAATATAAAAAAATTAGGATA  
GGAAAACGATAGTTATGAAGTGGCATTCAAGGAGGGATGAAGTATGGATAAGAAATACTCAATAGG  
CTTAGATATCGGCACAAATAGCGTCGGATGGGCGGTGATCACTGATGAATATAAGGTTCCGTCTAAA  
AAGTTCAAGTTCTGGGAAATACAGACCGCCACAGTATCAAAAAAATCTTATAGGGGCTCTTTTAT  
TTGACAGTGGAGAGACAGCGGAAGCGACTCGTCTCAAACGGACAGCTCGTAGAAGGTATACACGTC  
GGAAGAATCGTATTTGTTATCTACAGGAGATTTTTTCAAATGAGATGGCGAAAGTAGATGATAGTTTC  
TTTCATCGACTTGAAGAGTCTTTTTTGGTGAAGAAGACAAGAAGCATGAACGTCATCCTATTTTTGG  
AAATATAGTAGATGAAGTTGCTTATCATGAGAAATATCCAACATCTATCATCTGCGAAAAAATTG  
GTAGATTCTACTGATAAAGCGGATTTGCGCTTAATCTATTTGGCCTTAGCGCATATGATTAAGTTTCGT

GGTCATTTTTGATTGAGGGAGATTTAAATCCTGATAATAGTGATGTGGACAACTATTTATCCAGTTG  
GTACAAACCTACAATCAATTATTTGAAGAAAACCCTATTAACGCAAGTGGAGTAGATGCTAAAGCGA  
TTCTTTCTGCACGATTGAGTAAATCAAGACGATTAGAAAATCTCATTGCTCAGCTCCCCGGTGAGAAG  
AAAAATGGCTTATTTGGGAATCTCATTGCTTTGTCATTGGGTTTGACCCCTAATTTTAAATCAAATTTT  
GATTTGGCAGAAGATGCTAAATTACAGCTTTCAAAGATACTTACGATGATGATTTAGATAATTTATT  
GGCGCAAATTGGAGATCAATATGCTGATTTGTTTTGGCAGCTAAGAATTTATCAGATGCTATTTTACT  
TTCAGATATCCTAAGAGTAAATACTGAAATACTAAGGCTCCCCTATCAGCTTCAATGATTAAACGCT  
ACGATGAACATCATCAAGACTTGACTCTTTTAAAAGCTTTAGTTTCGACAACAACCTTCCAGAAAAGTAT  
AAAGAAATCTTTTTTGATCAATCAAAAAACGGATATGCAGGTTATATTGATGGGGGAGCTAGCCAAG  
AGAATTTTATAAATTTATCAAACCAATTTTAGAAAAAATGGATGGTACTGAGGAATTATTGGTGAA  
ACTAAATCGTGAAGATTTGCTGCGCAAGCAACGGACCTTTGACAACGGCTCTATTTCCCATCAAATTC  
ACTTGGGTGAGCTGCATGCTATTTTGAGAAGACAAGAAGACTTTTATCCATTTTTAAAAGACAATCGT  
GAGAAGATTGAAAAAATCTTGACTTTTCGAATTCCTTATTATGTTGGTCCATTGGCGCGTGGCAATAG  
TCGTTTTGCATGGATGACTCGGAAGTCTGAAGAAACAATTACCCCATGGAATTTGAAGAAGTTGTCG  
ATAAAGGTGCTTCAGCTCAATCATTTATTGAACGCATGACAACTTTGATAAAAAATCTTCCAAATGAA  
AAAGTACTACCAAACATAGTTTGCTTTATGAGTATTTTACGGTTTATAACGAATTGACAAAGGTCAA  
ATATGTTACTGAAGGAATGCGAAAACCAGCATTCTTTTCAGGTGAACAGAAGAAAGCCATTGTTGAT  
TACTCTTCAAAACAATCGAAAAGTAACCGTTAAGCAATTAAGAAGATTATTTCAAAAAAATAG  
AATGTTTTGATAGTGTGAAATTTTACGGAGTTGAAGATAGATTTAATGCTTCATTAGGTACCTACCATG  
ATTTGCTAAAAATTATTAAGATAAAGATTTTTTTGGATAATGAAGAAAATGAAGATATCTTAGAGGA  
TATTGTTTTAACATTGACCTTATTGAAGATAGGGAGATGATTGAGGAAAGACTTAAAACATATGCTC  
ACCTCTTTGATGATAAGGTGATGAAACAGCTTAAACGTCGCCGTTATACTGGTTGGGGACGTTTGTCT  
CGAAAATTGATTAATGGTATTAGGGATAAGCAATCTGGCAAACAATATTAGATTTTTTTGAAATCAG  
ATGGTTTTGCCAATCGCAATTTTATGCAGCTGATCCATGATGATAGTTTGACATTTAAAGAAGACATT  
CAAAAAGCACAAGTGTCTGGACAAGGCGATAGTTTACATGAACATATTGCAAATTTAGCTGGTAGCC  
CTGCTATTA AAAAAGGTATTTTACAGACTGTAAAAGTTGTTGATGAATTGGTCAAAGTAATGGGGCG  
GCATAAGCCAGAAAATATCGTTATTGAAATGGCACGTGAAAATCAGACAACCTCAAAGGGCCAGAA  
AAATTCGCGAGAGCGTATGAAACGAATCGAAGAAGGTATCAAAGAATTAGGAAGTCAGATTCTTAA  
AGAGCATCCTGTTGAAAATACTCAATTGCAAATGAAAAGCTCTATCTCTATTATCTCCAAAATGGAA  
GAGACATGTATGTGGACCAAGAATTAGATATTAATCGTTTAAAGTGATTATGATGTGATCACATTGTT  
CCACAAAGTTTCCTTAAAGACGATTCAATAGACAATAAGGTCTTAACGCGTTCTGATAAAAATCGTG  
GTAAATCGGATAACGTTCCAAGTGAAGAAGTAGTCAAAAAGATGAAAACCTATTGGAGACAACCTC  
TAAACGCCAAGTTAATCACTCAACGTAAGTTTGATAATTTAACGAAAGCTGAACGTGGAGGTTTGAG  
TGAACCTGATAAAGCTGGTTTTATCAAACGCCAATTGGTTGAAACTCGCCAAATCACTAAGCATGTGG  
CACAAATTTTGGATAGTCGCATGAATACTAAATACGATGAAAATGATAAACTTATTTCGAGAGGTTAA  
AGTGATTACCTTAAAATCTAAATTAGTTTCTGACTTCCGAAAAGATTTCCAATTCTATAAAGTACGTG  
AGATTAACAATTACCATCATGCCATGATGCGTATCTAAATGCCGTCGTTGGAACCTGCTTTGATTAAG  
AAATATCCAAAACCTTGAATCGGAGTTTGTCTATGGTGATTATAAAGTTTATGATGTTTCGTAAAATGAT  
TGCTAAGTCTGAGCAAGAAATAGGCAAAGCAACCGCAAATATTTCTTTTACTCTAATATCATGAACT  
TCTTCAAACAGAAATTACACTTGCAAATGGAGAGATTTCGCAAACGCCCTCTAATCGAAAATAATGG  
GAAAACCTGGAGAAATTGTCTGGGATAAAGGGCGAGATTTTGCCACAGTGGCCAAAGTATTGTCCATG  
CCCCAAGTCAATATTGTCAAGAAAACAGAAGTACAGACAGGCGGATTCTCCAAGGAGTCAATTTTAC

CAAAAAGAAATTCGGACAAGCTTATTGCTCGTAAAAAAGACTGGGATCCAAAAAATATGGTGGTTT  
TGATAGTCCAACGGTAGCTTATTCAGTCCTAGTGGTTGCTAAGGTGGAAAAAGGGAAATCGAAGAAG  
TTAAAATCCGTTAAAGAGTTACTAGGGATCACAAATTATGGAAAGAAGTTCCTTTGAAAAAATCCGA  
TTGACTTTTTAGAAAGCTAAAGGATATAAGGAAGTTAAAAAAGACTTAATCATTAAACTACCTAAATA  
TAGTCTTTTTGAGTTAGAAAACGGTCGTAAACGGATGCTGGCTAGTGCCGGAGAATTACAAAAAGGA  
AATGAGCTGGCTCTGCCAAGCAAATATGTGAATTTTTTATATTTAGCTAGTCATTATGAAAAGTTGAA  
GGGTAGTCCAGAAGATAACGAACAAAAACAATTGTTTGTGGAGCAGCATAAGCATTATTTAGATGAG  
ATTATTGAGCAAATCAGTGAATTTCTAAGCGTGTATTTTAGCAGATGCCAATTTAGATAAAGTTCTT  
AGTGCATATAACAAACATAGAGACAAACCAATACGTGAACAAGCAGAAAATATTATTCATTTATTTA  
CGTTGACGAATCTTGGAGCTCCCGCTGCTTTTAAATATTTTGATACAACAATTGATCGTAAACGATAT  
ACGTCTACAAAAGAAGTTTTAGATGCCACTCTTATCCATCAATCCATCACTGGTCTTTATGAAACACG  
CATTGATTTGAGTCAGCTAGGAGGTGACTGACCATGGTTGCTAGCTTCGATCGTTGAGCTCTTTCTAGA  
TTCTCGAGTTGGTACCTTGGCGCCACTTAATGATTTGCCAGTAAAAGAGATTGTTTCTAGCTCTCACAT  
TCTTGCAGATATAATATTGCCTAGAGCTGAAGTTATATATGATTATCTTAAGTAATAAAAATAAGAGT  
TACCTTAAATGGTAACTCTTATTTTTTTAAATGTATATTGATAAAAATAATAATAGTGGGTGTAATTAA  
GTTGTTAGGAGGTAGTGGGCCCCCTTATTCATGTTTTGAAACATTTTTATCTTTTGTGTATTTTACGT  
GTAGTAATTTGTGAGCAAGTCCTTCACCTGGTTTTCCAAAGTAGCTATCATACATTTTTAATAATAGCTG  
GATTATCATGTGACTTTCTCTTTGAAAGAACATTTTTATCTTGGTTGTATAATACTGATGCTCTTAGTTT  
TCTGTAATCAACATTTTCTCTATCAAGAGCATTACGTGAGGTTGACCTCCACCATTATACATCCACC  
AGGGCAAGCCATTACTTCTATAAAGTGATATTGTTTTTCGTTCATTTTTCCAGATTTCCATAAACTCGAA  
GAAGTTAGAAGCACCATTATATAACAGCAACGTTTAGTTTATTTCCAGCAATTTCAACTTCCGCTTCTTT  
TATGCCTTTAAAGCCTCTTACTTCAGTGTAATCAACATTTTCAAGTTCTTTATTTTCAGCAAAGTCTTTA  
GCTGATCTTATTGCAGCTTCCATAACGCCACCGGTTGCACCAAAGATAGCTCCAGCACCCTGTAAGT  
ACCCATAGCAGGATCAACTTCACCATCTTCAAGATCTGCAAATTTAATTTTTGCATCTTTAATCATTTT  
TGCAAGCTCTCTTGTAGTTAAGGATGCATCAATATCTCTTAAGCTGTTAGTTTCCATGAAAGGAATATC  
TGCTTCATATTTTTTATCATTACAAGGCATGATAGTAACTGTATAAACATCTTCTGGAGCTATTCCTGA  
AATTGAAGGATAGTAAGTTTTTGTGATGCAGTACCAAATATTTGTTGTGGTGATTTTGTCTGATGAAAGATT  
ATCTAATAATTCAGGATGATAATTTTGTAGCTAATCTTACCCATGCAGGACAGCAAGATGTAAACATA  
GGGAATGGGCCATTATTTTTAACTCTGCCTAAAAGTTCAGTAGCTTCTTCCATTATAGTCATATCTGCA  
CCAAAGTTTATATCAAATACTTTATCAAAGCCTAACATTCTAAGTGCAGTATATAGTTTTCTGTTACA  
TCTTTCCATATCCATTTGAATAATTGCCCCATAGCAGTTCTTACTGATGGAGCCATTGCAACAATG  
ACATGTTTTTTAGGGTCATTAAGAGCTTCTTGAACTTTTTCTATATGGGATTTTTCTTTTAAAGCAGCAA  
CAGAAGAGC
